# Supplementary material
Source: PubMed Central journal article supplement (PMC5844851)
Supplement: NIHMS937904-supplement-Figure_Legend.pdf [file NIHMS937904-supplement-Figure_Legend.pdf]

## Supplemental Figure Legends

Supplemental Figure 1. Scatterplots demonstrating Episodic Memory performance correlated with *Ngfb* (A), *TrkA ECD* (B), *TrkA TK* (C), *TrkB ECD* (D), *TrkB TK* (E), and *TrkC TK* (F) expression levels.

Supplemental Figure 2. Scatterplots illustrating correlations between Semantic Memory performance and *Cntf* (A), *TrkA ECD* (B), *TrkA TK* (C), *TrkB ECD* (D), and *TrkB TK* (E) expression levels.

Supplemental Figure 3. Scatterplot showing Working Memory performance correlated moderately with *TrkB Tk* (A) expression. Scatterplots show Perceptual Speed performance correlated with *TrkB ECD* (B) *TrkB TK* (C) expression levels.

Supplemental Figure 4. Scatterplots highlighting moderate correlations between the Visuospatial domain and *Cntf* (A), *Ngfb* (B), and *TrkB TK* expression levels. A strong correlation was observed between the Visuospatial domain and *TrkB ECD* (D) expression.
