# Supplementary material
Source: PubMed Central journal article supplement (PMC5844851)
Supplement: NIHMS937904-supplement-Table_1.pdf [file NIHMS937904-supplement-Table_1.pdf]

## Supplemental Table ST1

Comparison of group differences for transcripts obtained from amnesic MCI and non-amnesic MCI subjects.

---

**CA1 pyramidal neurons**

---

| <i>Transcript</i>        | <i>p-value</i> |
|--------------------------|----------------|
| <i>Gdnf</i>              | 0.35           |
| <i>Bdnf</i>              | 0.56           |
| <i>Cntf</i>              | 0.41           |
| <i>Ngfb</i>              | 0.99           |
| <i>Ntf3</i>              | 0.81           |
| <i>Ntf5</i>              | 0.16           |
| <i>p75<sup>NTR</sup></i> | 0.41           |
| <i>TrkA ECD</i>          | 0.64           |
| <i>TrkA TK</i>           | 0.72           |
| <i>TrkB ECD</i>          | 0.08           |
| <i>TrkB TK</i>           | 0.24           |
| <i>TrkC ECD</i>          | 0.35           |
| <i>TrkC TK</i>           | 0.24           |

---

**Hippocampus**

---

| <i>Transcript</i>        | <i>p-value</i> |
|--------------------------|----------------|
| <i>Gdnf</i>              | 0.30           |
| <i>Bdnf</i>              | 0.60           |
| <i>Cntf</i>              | 0.04           |
| <i>Ngfb</i>              | 0.60           |
| <i>Ntf3</i>              | 0.99           |
| <i>Ntf5</i>              | 0.43           |
| <i>p75<sup>NTR</sup></i> | 0.19           |
| <i>TrkA ECD</i>          | 0.99           |
| <i>TrkA TK</i>           | 0.60           |
| <i>TrkB ECD</i>          | 0.19           |
| <i>TrkB TK</i>           | 0.07           |
| <i>TrkC ECD</i>          | 0.19           |
| <i>TrkC TK</i>           | 0.60           |

---

No statistically significant differences were observed between amnesic MCI and non-amnesic MCI patients in terms of neurotrophin or neurotrophin receptor mRNAs after adjusting for multiple comparisons.
