# Supplementary material
Source: PubMed Central journal article supplement (PMC5844851)
Supplement: NIHMS937904-supplement-Table_2.pdf [file NIHMS937904-supplement-Table_2.pdf]

## Supplemental Table ST2

Lack of correlations of select neurotrophin and neurotrophin receptor mRNAs within CA1 pyramidal neurons with NPs, DPs, and NFTs.

|                        | <i>Gdnf</i> | <i>Bdnf</i> | <i>Cntf</i> | <i>Ngfb</i> | <i>Ntf3</i> | <i>Ntf5</i> | <i>p75<sup>NTR</sup></i> | <i>TrkA ECD</i> | <i>TrkA TK</i> | <i>TrkB ECD</i> | <i>TrkB TK</i> | <i>TrkC ECD</i> | <i>TrkC TK</i> |
|------------------------|-------------|-------------|-------------|-------------|-------------|-------------|--------------------------|-----------------|----------------|-----------------|----------------|-----------------|----------------|
| Entorhinal cortex NPs  | -0.13       | -0.08       | 0.03        | -0.08       | -0.05       | 0.07        | -0.13                    | -0.12           | 0.03           | -0.38           | -0.43          | -0.37           | -0.48          |
| Hippocampal CA1 NPs    | -0.31       | -0.09       | -0.10       | -0.16       | -0.05       | 0.10        | -0.07                    | -0.23           | 0.06           | -0.41           | -0.42          | -0.42           | -0.40          |
| Entorhinal cortex DPs  | -0.35       | 0.20        | -0.14       | -0.10       | -0.28       | -0.10       | -0.17                    | -0.06           | -0.10          | -0.34           | -0.29          | -0.28           | -0.20          |
| Hippocampal CA1 DPs    | -0.27       | -0.07       | -0.24       | -0.09       | -0.18       | -0.07       | 0.02                     | -0.18           | 0.03           | -0.19           | -0.29          | -0.16           | -0.23          |
| Entorhinal cortex NFTs | -0.21       | -0.35       | 0.11        | -0.16       | -0.03       | 0.19        | 0.03                     | -0.03           | -0.02          | -0.37           | -0.35          | -0.26           | -0.46          |
| Hippocampal CA1 NFTs   | -0.12       | -0.20       | -0.01       | 0.09        | 0.06        | 0.25        | -0.02                    | -0.19           | -0.20          | -0.23           | -0.25          | -0.18           | -0.29          |

No statistically significant correlations were observed after adjusting for multiple comparisons.
