# Supplementary material
Source: PubMed Central journal article supplement (PMC5844851)
Supplement: NIHMS937904-supplement-Table_3.pdf [file NIHMS937904-supplement-Table_3.pdf]

### Supplemental Table ST3

Comparison of group differences for transcripts obtained from microdissected CA1 pyramidal neurons for AD subjects from the RROS and CNDR cohorts.

| <b>CA1 pyramidal neurons</b> |                |
|------------------------------|----------------|
| <i>Transcript</i>            | <i>p-value</i> |
| <i>Gdnf</i>                  | 0.42           |
| <i>Bdnf</i>                  | 0.05           |
| <i>Cntf</i>                  | 0.04           |
| <i>Ngfb</i>                  | 0.08           |
| <i>Ntf3</i>                  | 0.11           |
| <i>Ntf4</i>                  | 0.05           |
| <i>p75<sup>NTR</sup></i>     | 0.63           |
| <i>TrkA ECD</i>              | 0.20           |
| <i>TrkA TK</i>               | 0.87           |
| <i>TrkB ECD</i>              | 0.15           |
| <i>TrkB TK</i>               | 0.05           |
| <i>TrkC ECD</i>              | 0.63           |
| <i>TrkC TK</i>               | 0.87           |

Comparison of group differences for transcripts obtained from regional hippocampal dissections for AD and NCI subjects from the RROS and CNDR cohorts.

| <b>Hippocampus AD</b>    |                | <b>Hippocampus NCI</b>   |                |
|--------------------------|----------------|--------------------------|----------------|
| <i>Transcript</i>        | <i>p-value</i> | <i>Transcript</i>        | <i>p-value</i> |
| <i>Gdnf</i>              | 0.02           | <i>Gdnf</i>              | 0.56           |
| <i>Bdnf</i>              | 0.87           | <i>Bdnf</i>              | 0.99           |
| <i>Cntf</i>              | 0.08           | <i>Cntf</i>              | 0.77           |
| <i>Ngfb</i>              | 0.20           | <i>Ngfb</i>              | 0.02           |
| <i>Ntf3</i>              | 0.52           | <i>Ntf3</i>              | 0.56           |
| <i>Ntf4</i>              | 0.42           | <i>Ntf4</i>              | 0.77           |
| <i>Ntf5</i>              | 0.99           | <i>Ntf5</i>              | 0.08           |
| <i>p75<sup>NTR</sup></i> | 0.52           | <i>p75<sup>NTR</sup></i> | 0.15           |
| <i>TrkA ECD</i>          | 0.87           | <i>TrkA ECD</i>          | 0.77           |
| <i>TrkA TK</i>           | 0.42           | <i>TrkA TK</i>           | 0.77           |
| <i>TrkB ECD</i>          | 0.87           | <i>TrkB ECD</i>          | 0.25           |
| <i>TrkB TK</i>           | 0.52           | <i>TrkB TK</i>           | 0.15           |
| <i>TrkC ECD</i>          | 0.34           | <i>TrkC ECD</i>          | 0.39           |
| <i>TrkC TK</i>           | 0.87           | <i>TrkC TK</i>           | 0.77           |

No statistically significant differences in neurotrophin or neurotrophin receptor expression levels were observed between RROS or CNDR cohorts after adjusting for multiple comparisons.
