# Supplementary material
Source: PubMed Central journal article supplement (PMC5844851)

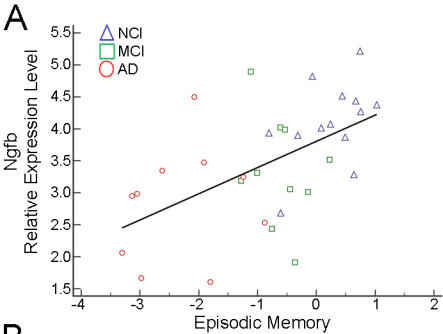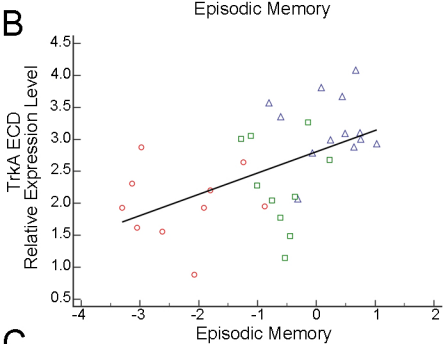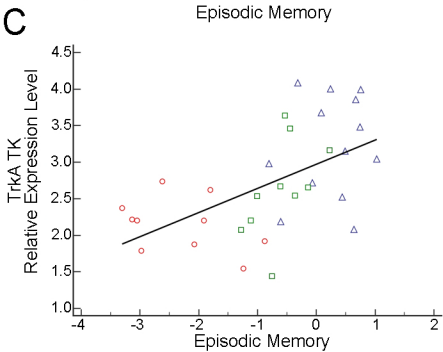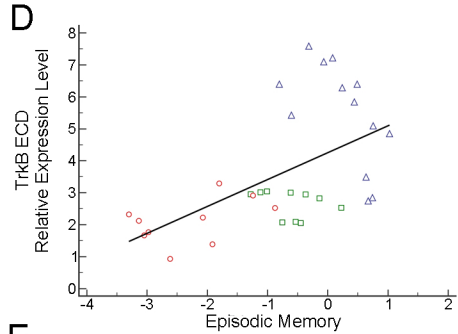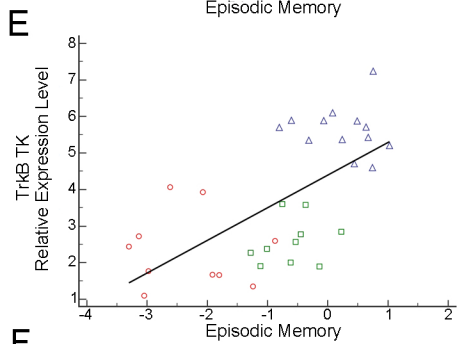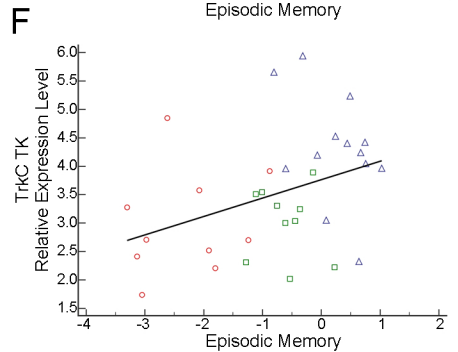

Supplement: NIHMS937904-supplement-Figure_SF1.pdf [file NIHMS937904-supplement-Figure_SF1.pdf]

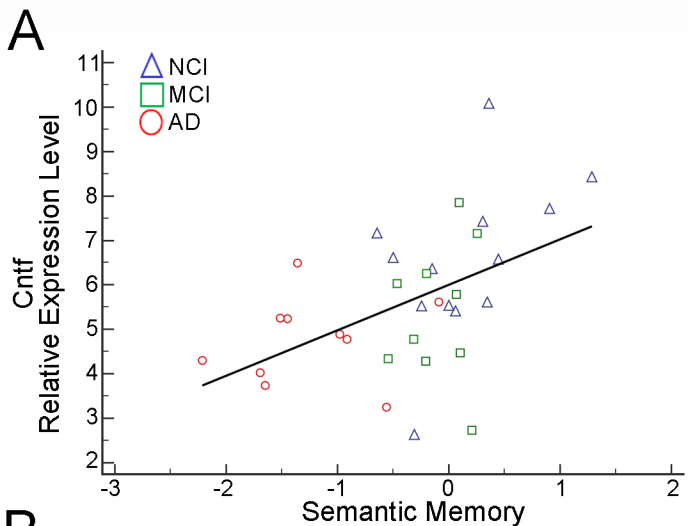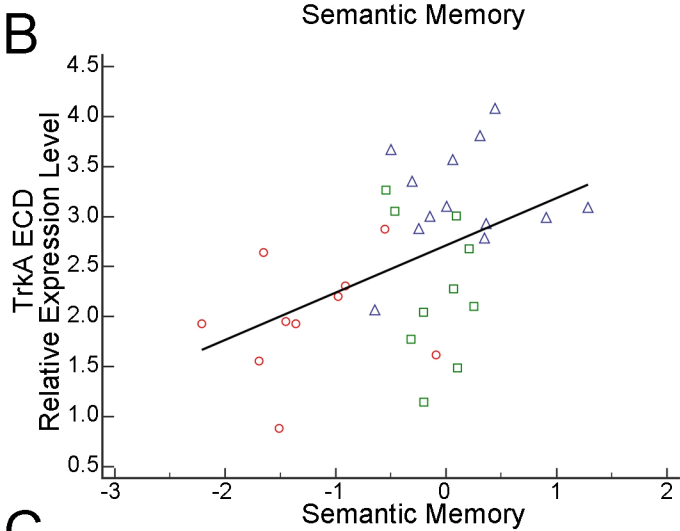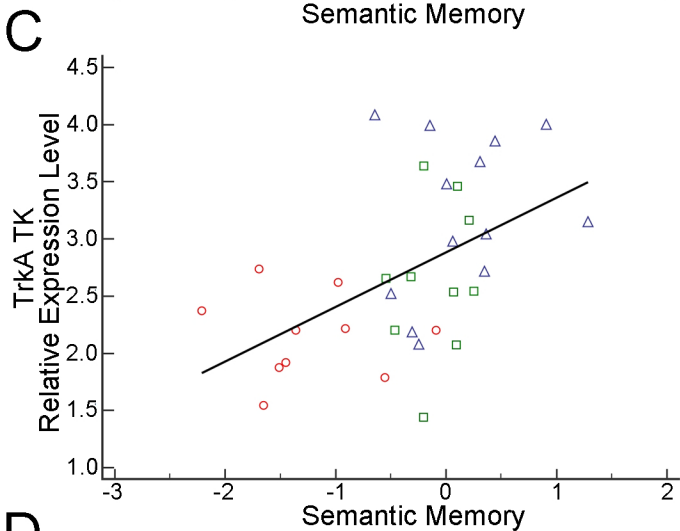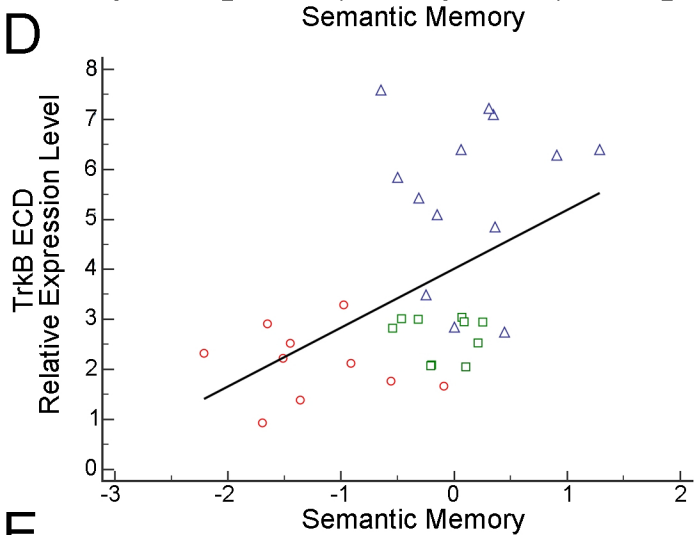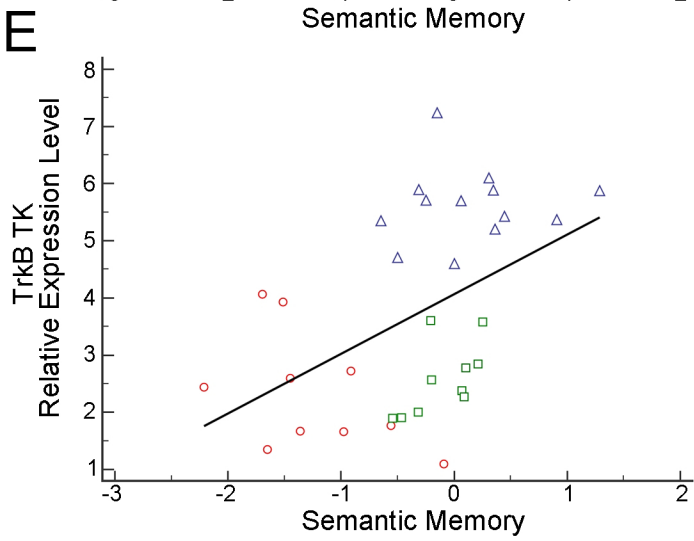

Supplement: NIHMS937904-supplement-Figure_SF2.pdf [file NIHMS937904-supplement-Figure_SF2.pdf]

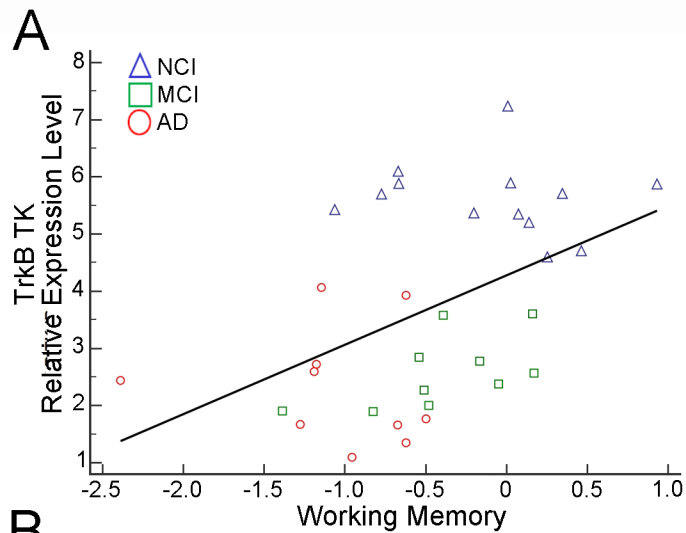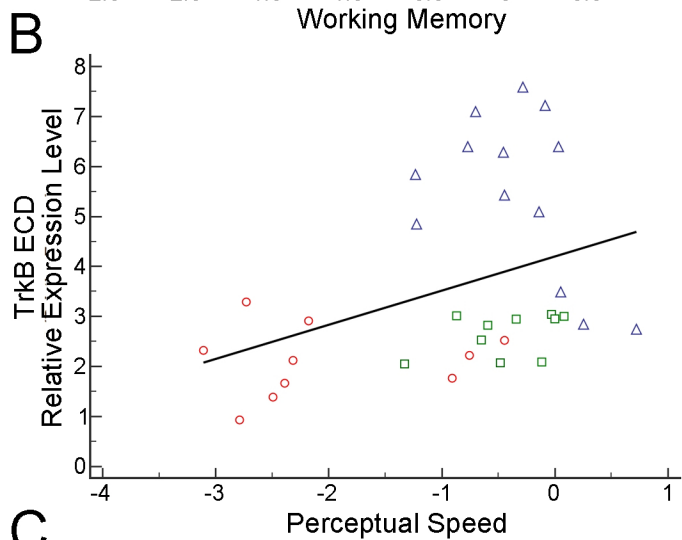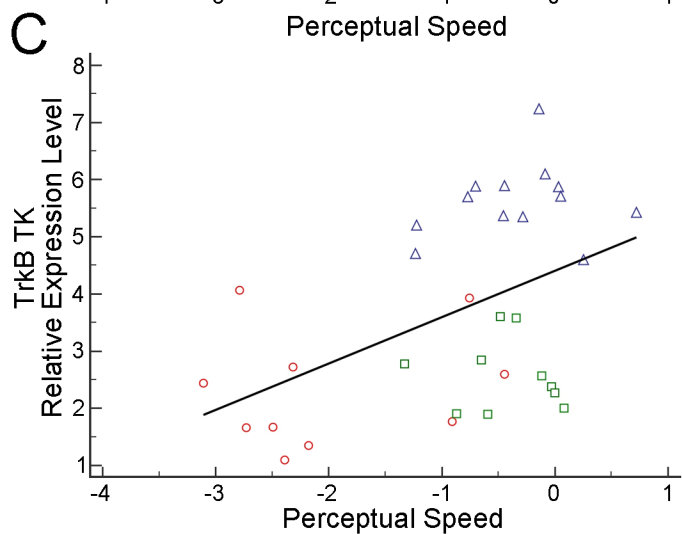

Supplement: NIHMS937904-supplement-Figure_SF3.pdf [file NIHMS937904-supplement-Figure_SF3.pdf]

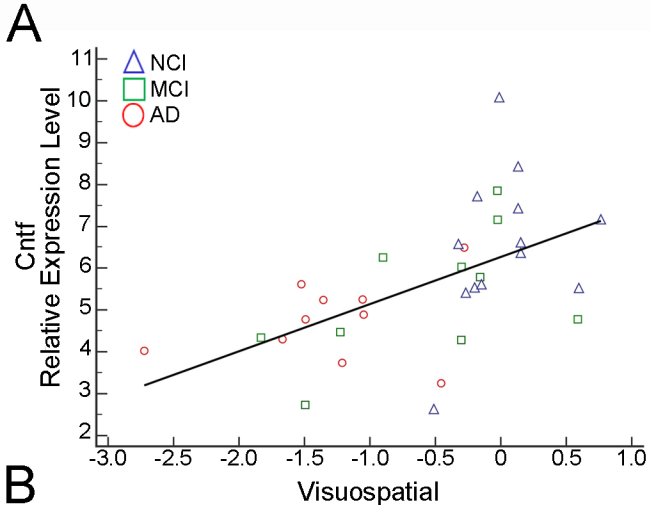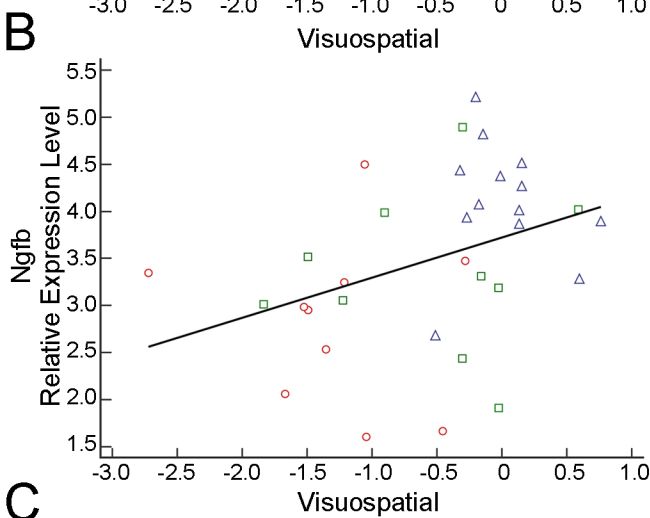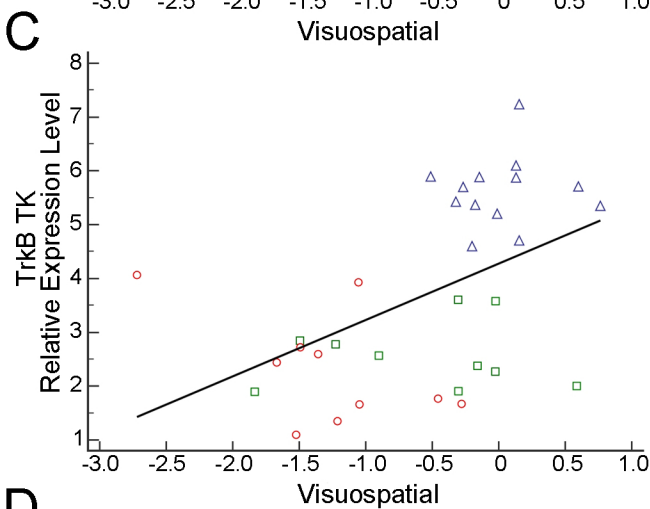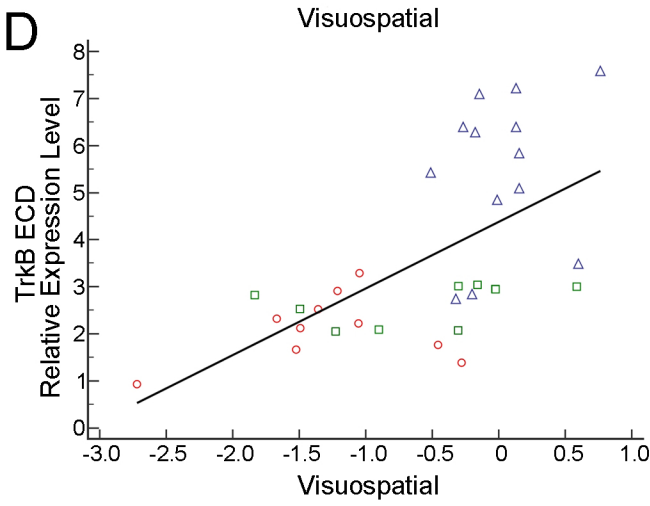

Supplement: NIHMS937904-supplement-Figure_SF4.pdf [file NIHMS937904-supplement-Figure_SF4.pdf]
